# Supplementary material
Source: Springer Nature journal article supplement (https://www.springermedizin.de/resource/supplementary/13058_2009_2528_MOESM3_ESM.pdf/9701620)

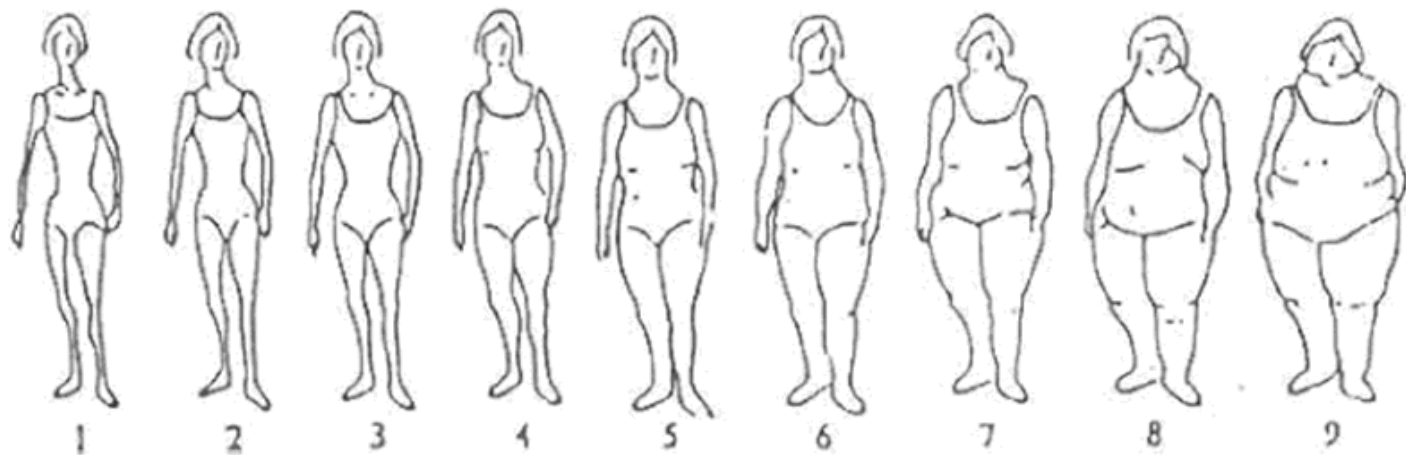

Age 7

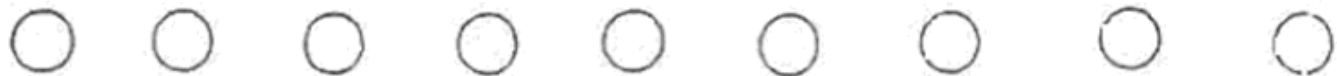

One year prior  
to enrolment

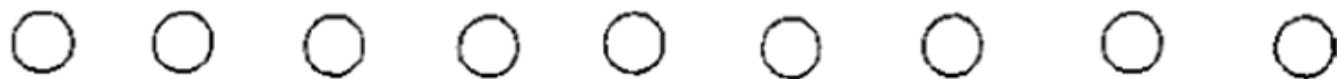

← lean → ← medium → ← large →

Supplement: MOESM3 [file 9701620]
